# Supplementary material for: Optimizing the size-dependent dielectric properties of metal–organic framework-derived Co/C composites for highly efficient microwave absorption
Source: Royal Society of Chemistry journal article supplement (doi:10.1039/d0qi01502d), 2021-01-01
Supplement: d0qi01502d1.pdf [file d0qi01502d1.pdf]

## Supporting Information

# Optimizing size-dependent dielectric properties of metal-organic framework-derived Co/C composites for highly efficient microwave absorption

Wei Liu,<sup>abcd</sup> Pengtao Duan,<sup>b</sup> Chao Mei,<sup>b</sup> Kun Wan,<sup>b</sup> Bowei Zhang,<sup>b</sup> Hailin Su,<sup>\*abcd</sup>  
Xuebin Zhang<sup>\*abcd</sup> and Zhongqiu Zou<sup>\*cd</sup>

a Engineering Research Center of High Performance Copper Alloy Materials and Processing, Ministry of Education, Hefei University of Technology, Hefei, 230009, China

b School of Materials Science and Engineering and Anhui Provincial Key Laboratory of Advanced Functional Materials and Devices, Hefei University of Technology, Hefei, 230009, China

c Huaian Engineering Research Center of Soft Magnetic Powder Cores and Devices, Jiangsu Red Magnetic Materials Incorporation, Huaian, 211700, China

d Anhui Red Magneto-electric Technology Co., Ltd., Wuhu, 241002, China

### Corresponding Author

Email: hailinsu@hfut.edu.cn; zzhhxxbb@126.com; zhgl@red-mag.com.cn

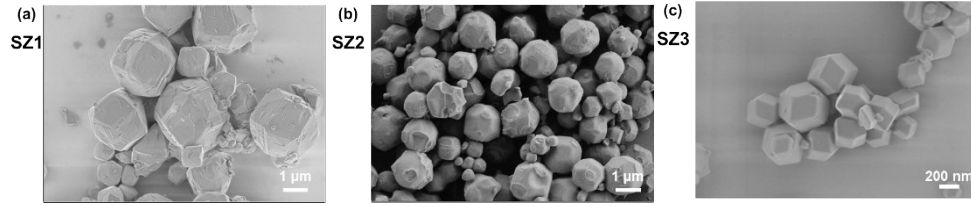

**Fig. S1** SEM images of (a) SZ1, (b) SZ2 and (c) SZ3.

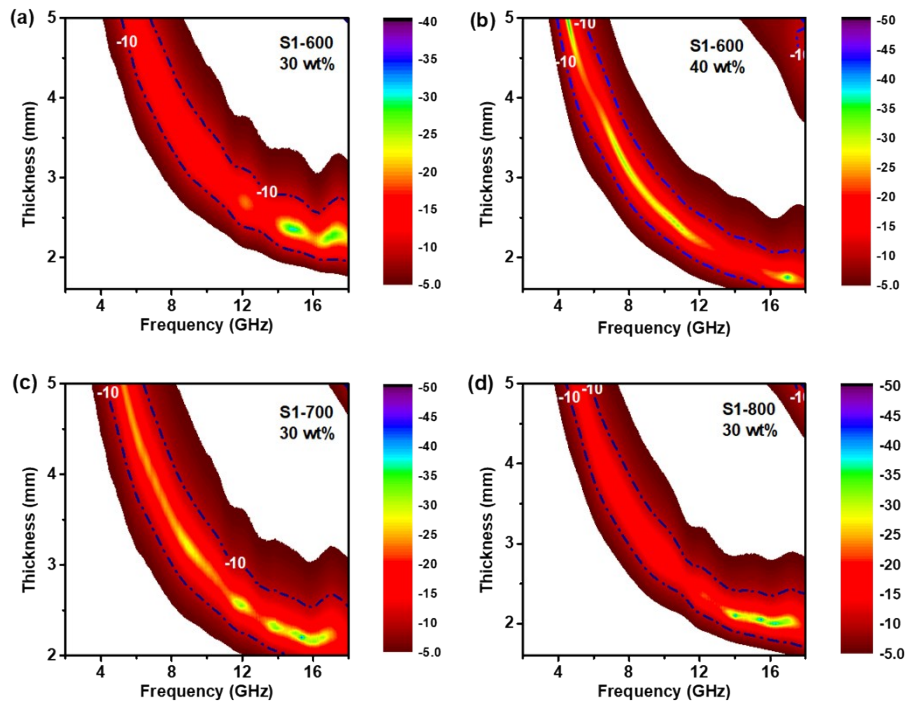

**Fig. S2** Reflection loss contour map of (a) S1-600 with filling ratio of 30 wt%, (b) S1-600 with filling ratio of 40 wt%, (c) S1-700 with filling ratio of 30 wt% and (d) S1-800 with filling ratio of 30 wt%.

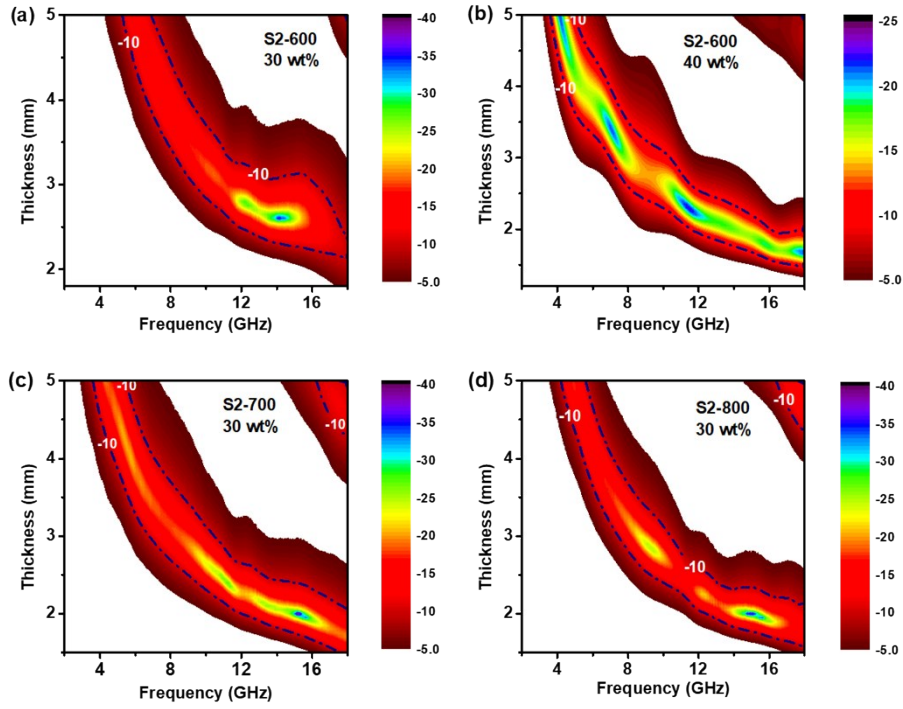

**Fig. S3** Reflection loss contour map of (a) S2-600 with filling ratio of 30 wt%, (b) S2-600 with filling ratio of 40 wt%, (c) S2-700 with filling ratio of 30 wt% and (d) S2-800 with filling ratio of 30 wt%.

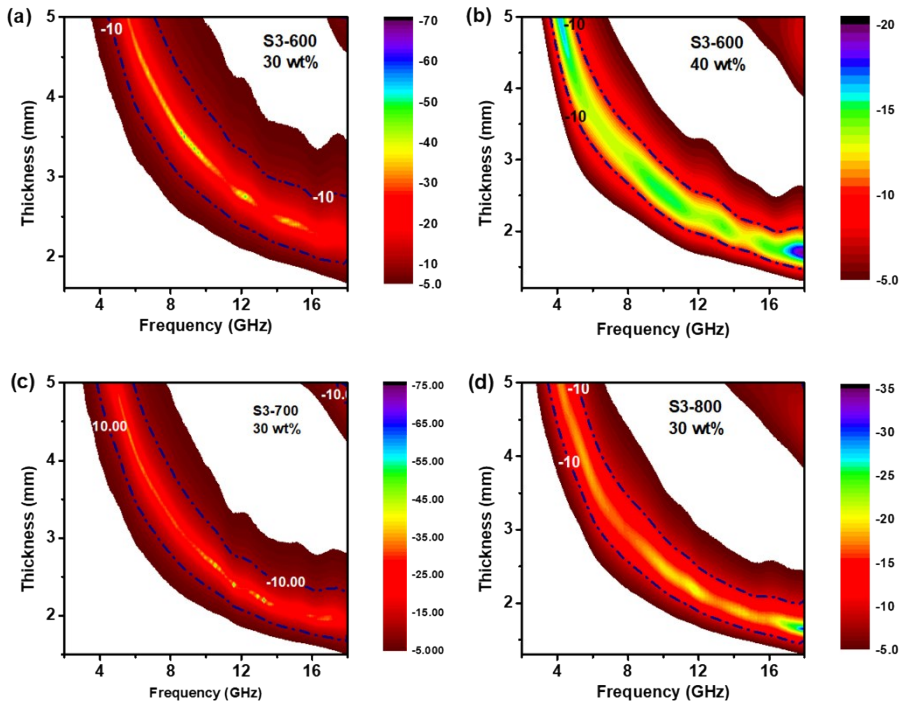

**Fig. S4** Reflection loss contour map of (a) S3-600 with filling ratio of 30 wt%, (b) S3-600 with filling ratio of 40 wt%, (c) S3-700 with filling ratio of 30 wt% and (d) S3-800 with filling ratio of 30 wt%.

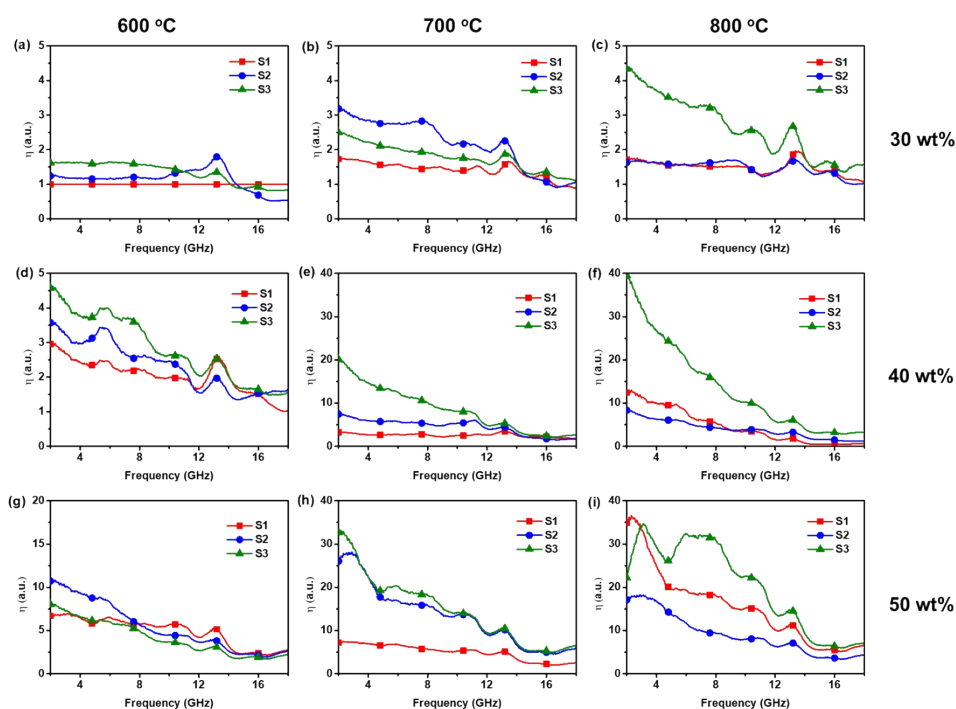

**Fig. S5** Ratios of electric conductivity ( $\eta$ ) for Co/C composites at filling ratio of 30 wt% obtained at: (a) 600 °C, (b) 700 °C, (c) 800 °C; at filling ratio of 40 wt% obtained at: (d) 600 °C, (e) 700 °C, (f) 800 °C; at filling ratio of 50 wt% obtained at: (g) 600 °C, (h) 700 °C, (i) 800 °C on the basis of S1-600 at filling ratio of 30 wt%.

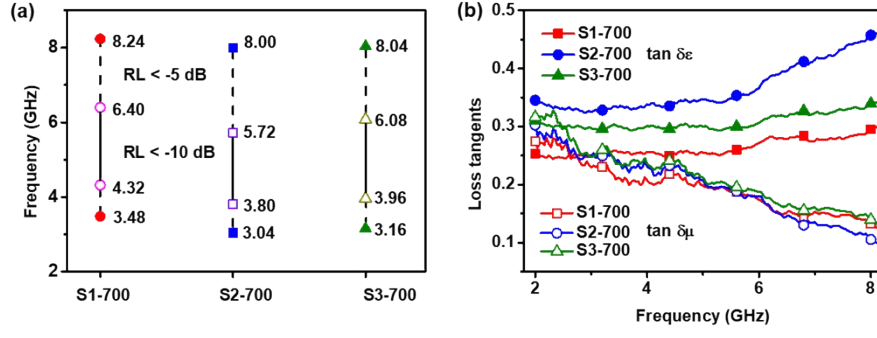

**Fig. S6** (a) Effective absorption bandwidth of S1-700, S2-700 and S3-700 (solid line for reflection loss value less than -10 dB and dash line for reflection loss value less than -5 dB). (b) Loss tangents of S1-700, S2-700 and S3-700.
